# Supplementary material for: Impact of a deprescribing tool on the use of sedative hypnotics among older patients: study protocol for a cluster randomised controlled trial in Swiss primary care (the HYPE trial)
Source: HighWire-hosted journal article supplement (doi:10.1136/bmjopen-2023-075828), 2023-09-01
Supplement: bmjopen-2023-075828supp001_data_supplement.pdf [file bmjopen-2023-075828supp001_data_supplement.pdf]

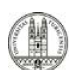

Universität  
Zürich

**USZ** Universitäts  
Spital Zürich

Institut für Hausarztmedizin

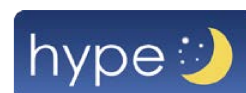

## Tapering protocol

| Week | Mon | Tue | Wed | Thu | Fri | Sat | Sun |
|------|-----|-----|-----|-----|-----|-----|-----|
| 01   |     |     |     |     |     |     |     |
| 02   |     |     |     |     |     |     |     |
| 03   |     |     |     |     |     |     |     |
| 04   |     |     |     |     |     |     |     |
| 05   |     |     |     |     |     |     |     |
| 06   |     |     |     |     |     |     |     |
| 07   |     |     |     |     |     |     |     |
| 08   |     |     |     |     |     |     |     |
| 09   |     |     |     |     |     |     |     |
| 10   |     |     |     |     |     |     |     |
| 11   |     |     |     |     |     |     |     |
| 12   |     |     |     |     |     |     |     |
| 13   |     |     |     |     |     |     |     |
| 14   |     |     |     |     |     |     |     |
| 15   |     |     |     |     |     |     |     |
| 16   |     |     |     |     |     |     |     |
| 17+  |     |     |     |     |     |     |     |

hype\_Tapering protocol\_V1\_08.11.2022
