# Supplementary material for: Impact of a deprescribing tool on the use of sedative hypnotics among older patients: study protocol for a cluster randomised controlled trial in Swiss primary care (the HYPE trial)
Source: HighWire-hosted journal article supplement (doi:10.1136/bmjopen-2023-075828), 2023-09-01
Supplement: bmjopen-2023-075828supp004_data_supplement.pdf [file bmjopen-2023-075828supp004_data_supplement.pdf]

Supplementary File 4. Process and implementation outcomes (according to the RE-AIM framework)

| Outcome                                                                                                                                       | Remarks                                                                       | Data source                     |
|-----------------------------------------------------------------------------------------------------------------------------------------------|-------------------------------------------------------------------------------|---------------------------------|
| <b>Reach:</b>                                                                                                                                 |                                                                               |                                 |
| <b>Proportion and representativeness</b> of individuals receiving the intervention (individual level)                                         |                                                                               |                                 |
| Rate of BSH users invited to participate                                                                                                      | # BSH users invited / # BSH users among all patients of the participating GPs | GPs' records                    |
| Rate of refusals, with reasons                                                                                                                | # BSH users invited but refused participation / # BSH users invited           | GPs' records                    |
| Rates of patient drop-outs and losses-to-follow up, with reasons                                                                              | # BSH users included but not followed up for 6 months / # BSH users included  | SC's records                    |
| Patients' characteristics and representativeness                                                                                              | To be compared with refusals and with Swiss health census data                | Patients' records               |
| <b>Efficacy:</b>                                                                                                                              |                                                                               |                                 |
| <b>Success rates</b> of the intervention (incl. <b>satisfaction outcomes</b> ) under study conditions (individual level)                      |                                                                               |                                 |
| BSH use change rates                                                                                                                          | Primary outcome                                                               | GPs' records                    |
| Rates of patients willing/refusing at T0 to change their BSH use                                                                              | Secondary outcomes 1 & 2                                                      | GPs' records                    |
| Incidence rates of falls and other events between T0 and T1                                                                                   | Secondary outcome 3                                                           | GPs' records, patients' records |
| Mean changes from T0 to T1 in cognitive function levels, depressive symptoms, subjective sleep quality, anxiety symptoms, and quality of life | Secondary outcomes 4-8                                                        | Patients' records               |
| Reasons for motivation to change BSH use and for successful change (facilitators)                                                             | Of GPs (T2) and patients (T1)                                                 | GPs' records                    |
| Reasons for refusing changes in BSH usage and for failure to change BSH use (barriers)                                                        | Of GPs (T2) and patients (T1)                                                 | GPs' records                    |
| Usefulness of the patient support tool (decision-making guidance, tapering schedule, non-pharmaceutical alternative)                          |                                                                               | Patients' records               |

|                                                                                                                                                                                                                                                 |                                                                                                          |               |
|-------------------------------------------------------------------------------------------------------------------------------------------------------------------------------------------------------------------------------------------------|----------------------------------------------------------------------------------------------------------|---------------|
| treatments for insomnia), as perceived by patients                                                                                                                                                                                              |                                                                                                          |               |
| <b>Adoption:</b><br><b>Proportion and representativeness</b> of organizations willing to adopt the intervention, with consideration of <b>enablers and barriers</b> to adoption (organizational level)                                          |                                                                                                          |               |
| Rate of GPs invited to participate                                                                                                                                                                                                              | # GPs invited / # total GPs eligible                                                                     | SC's records, |
| Rate of GPs' refusals, with reasons                                                                                                                                                                                                             | # GPs invited but refused participation / # GPs invited                                                  | SC's records  |
| Dropout rate of GPs, with reasons                                                                                                                                                                                                               | # GPs included but not delivering coaching / # GPs included                                              | SC's records  |
| GPs' characteristics and representativeness                                                                                                                                                                                                     | To be compared to data from networks or professional associations of physicians, or from federal sources | GPs' records  |
| <b>Implementation:</b><br>Extent to which the intervention is implemented under real world conditions: <b>Patient adherence</b> (individual level) and <b>adherence of staff to study protocol</b> ("protocol fidelity") (organizational level) |                                                                                                          |               |
| Completeness/integrity of data reported by patients and GPs                                                                                                                                                                                     | From returned CRFs, logs etc.                                                                            | SC's records  |
| Usefulness of the patient support tool, as perceived by GPs                                                                                                                                                                                     |                                                                                                          | GPs' records  |
| GPs' implementation fidelity                                                                                                                                                                                                                    | Adaptations made and inconsistencies incurred to the intervention during the ongoing study               | GPs' records  |
| GPs' reasons for implementation success or failure                                                                                                                                                                                              |                                                                                                          | GPs' records  |
| <b>Maintenance:</b><br>Sustainability of intervention over time: <b>Relapse rates</b> (individual level) and <b>integration of intervention into institutional routine</b> (organizational level)                                               |                                                                                                          |               |
| GPs' use of the support tool after T1                                                                                                                                                                                                           |                                                                                                          | GPs' records  |
| Recommendations to peers                                                                                                                                                                                                                        |                                                                                                          | GPs' records  |

GP(s) = general practitioner(s); SC = study center; T0 = initial consultation (patient-specific); T1 = 6 Months after T0 (patient-specific); T2 = 14 Months after First T0 (GP-specific).
